# Supplementary figures and images for: Time-Resolved Profiling Reveals ATF3 as a Novel Mediator of Endocrine Resistance in Breast Cancer
Source: MDPI journal article supplement (doi:10.3390/cancers12102918), 2020-10-11

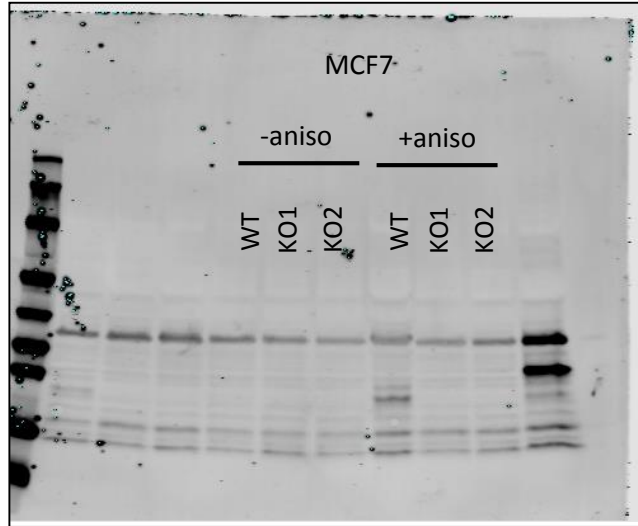

ATF3

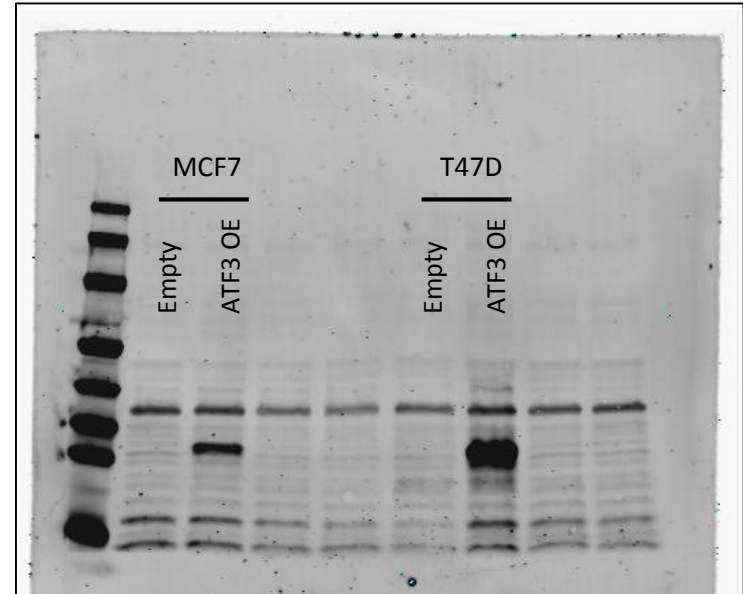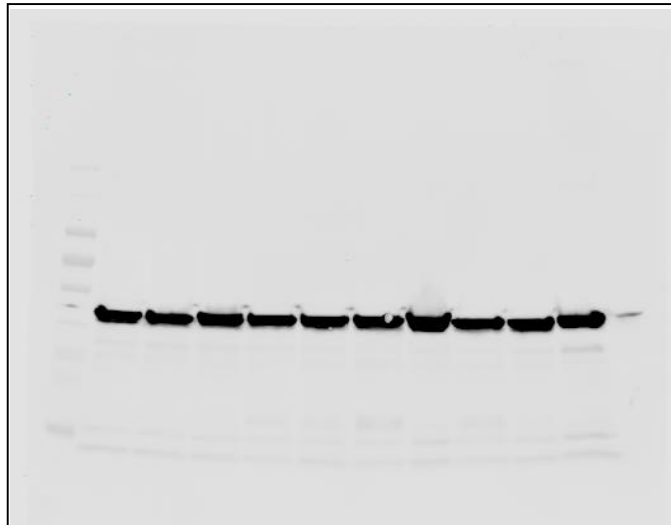

ACT

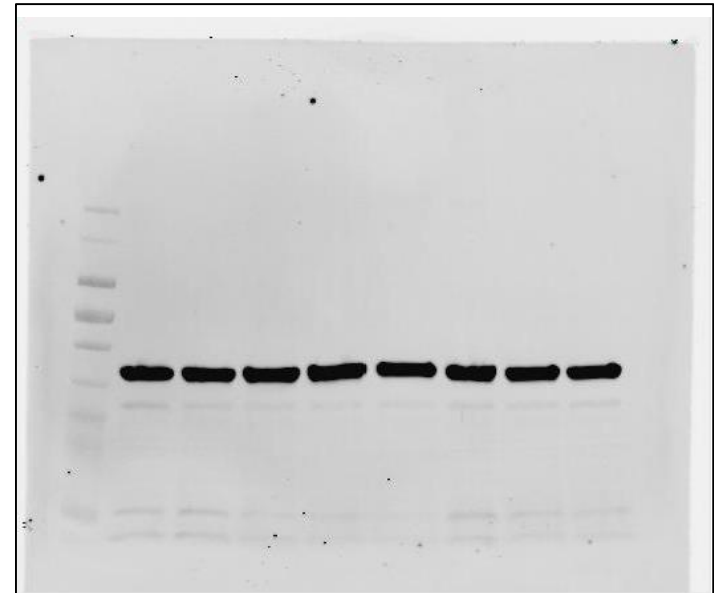

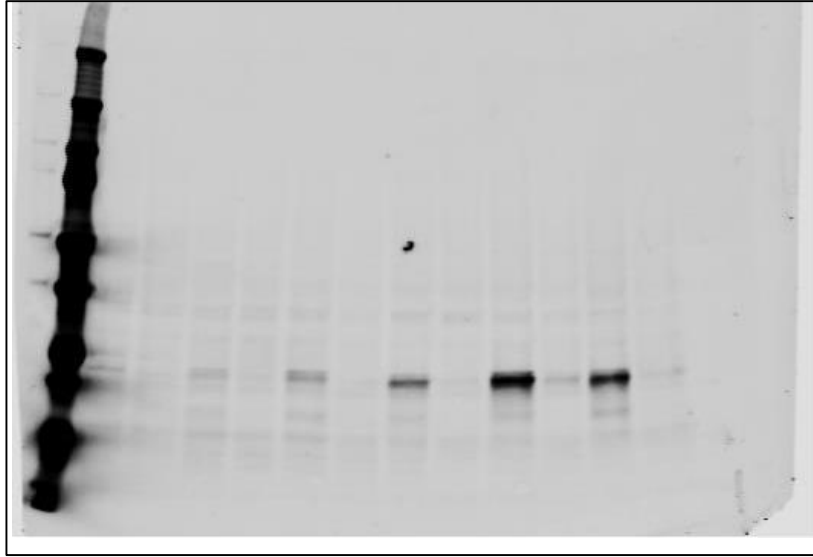

ATF3

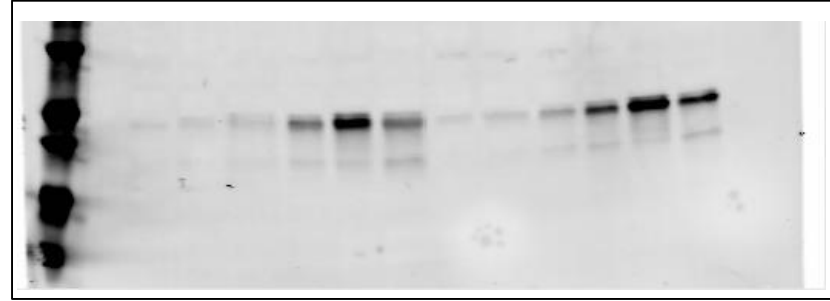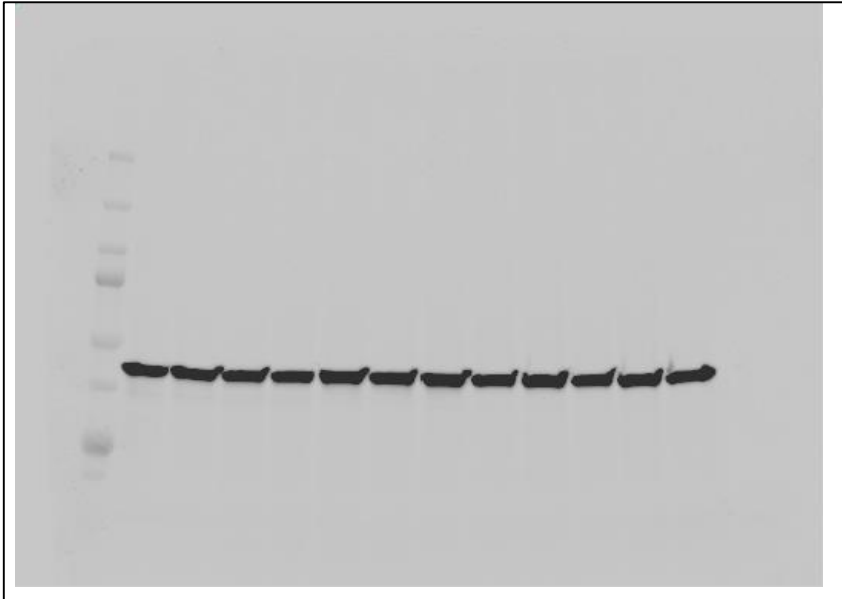

ACTB

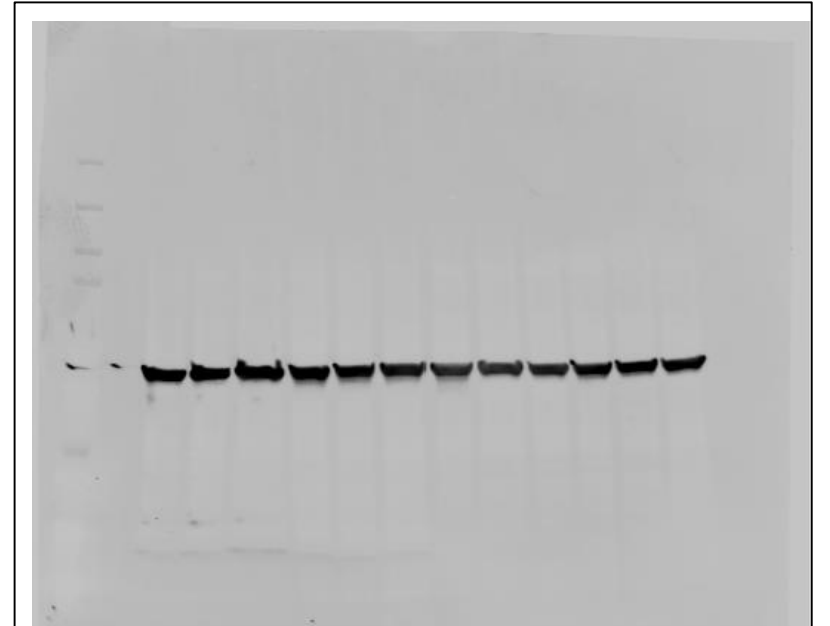

ATF3

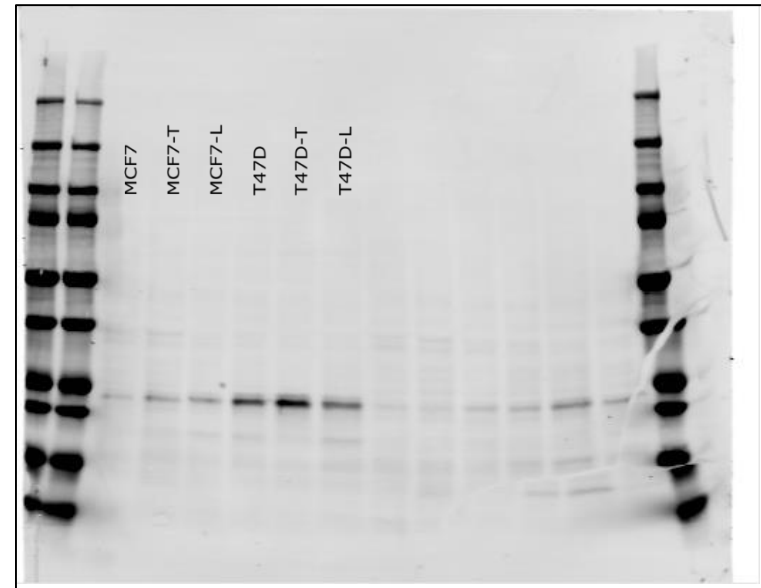

ACTB

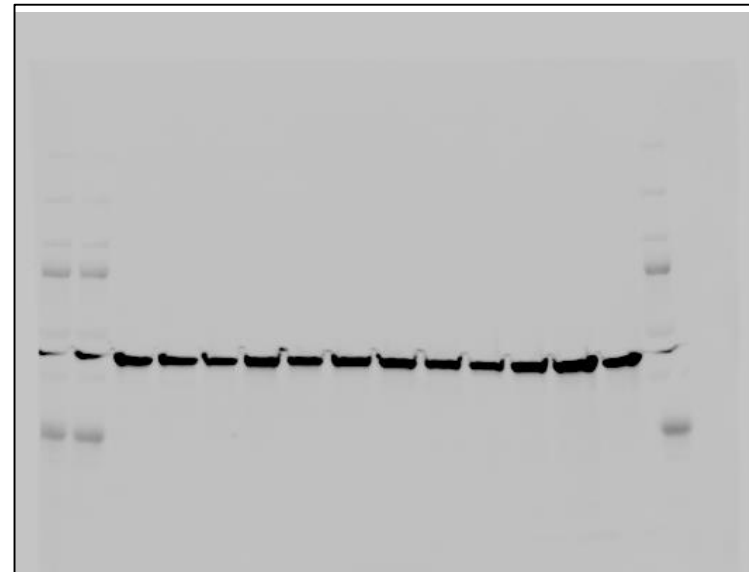

Supplement: s1 [file s1]
